# Supplementary material
Source: PubMed Central journal article supplement (PMC2895694)

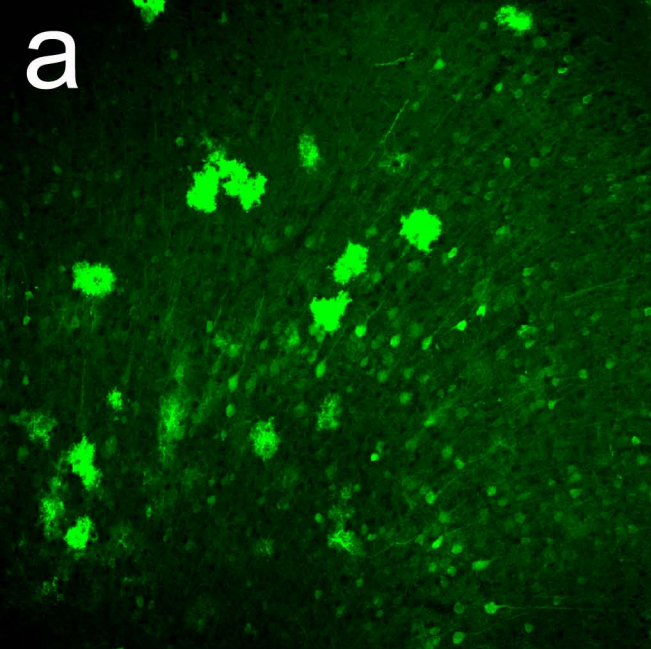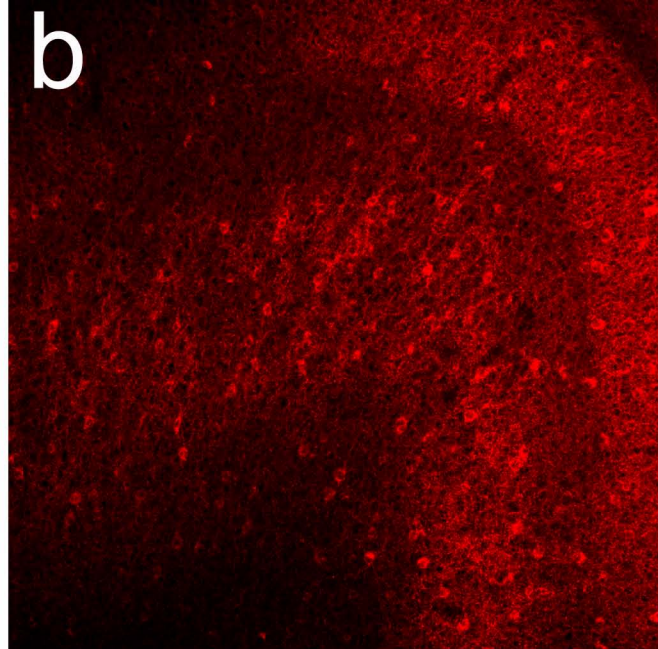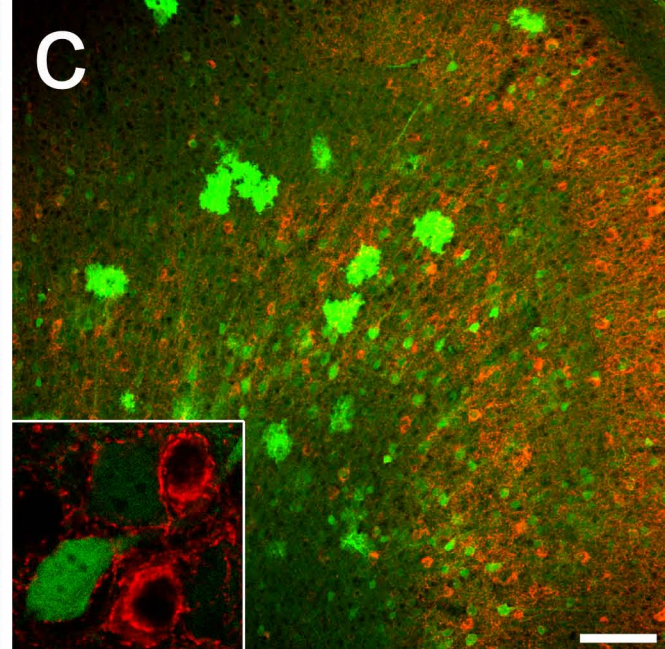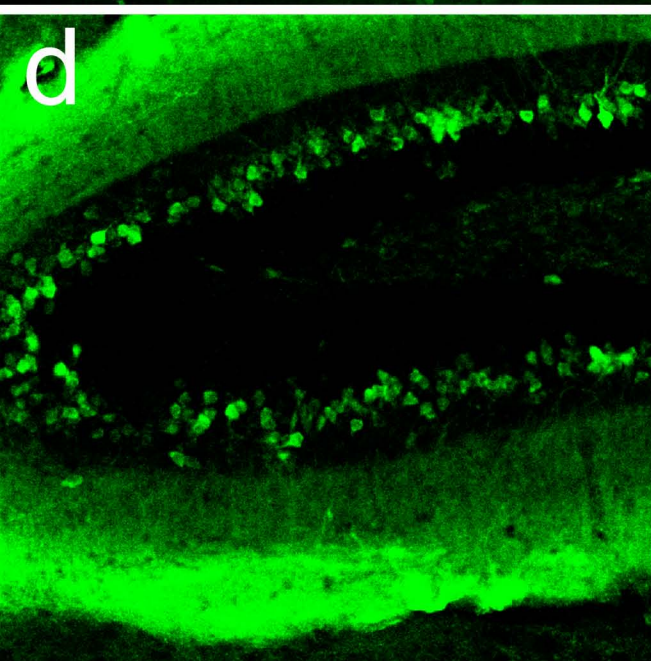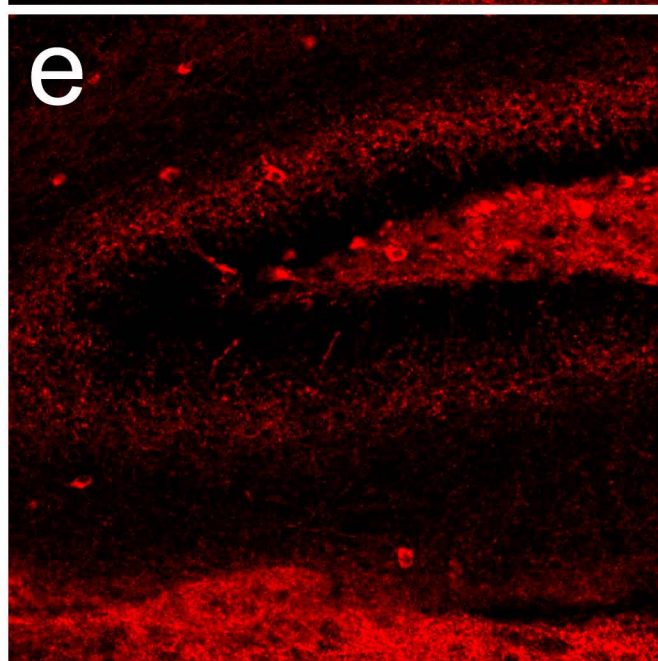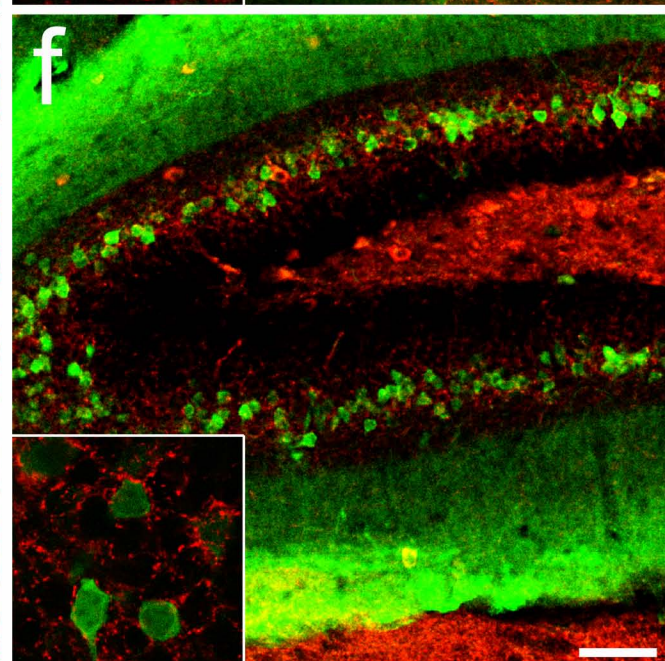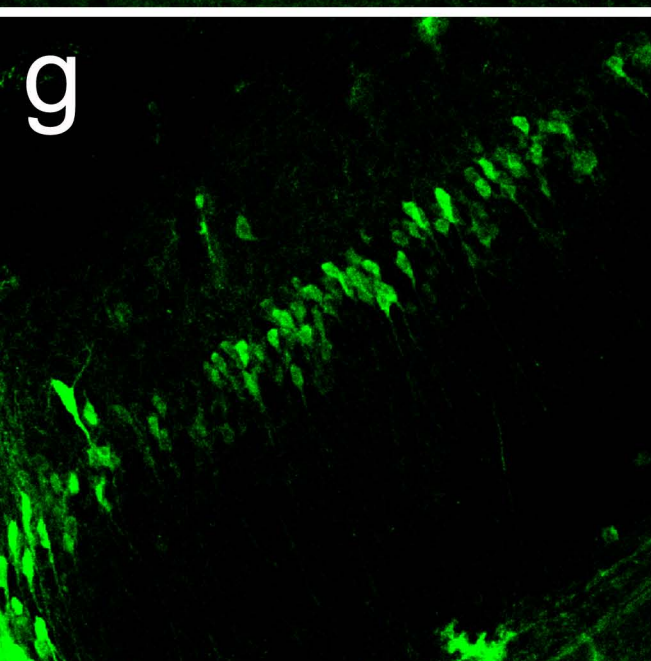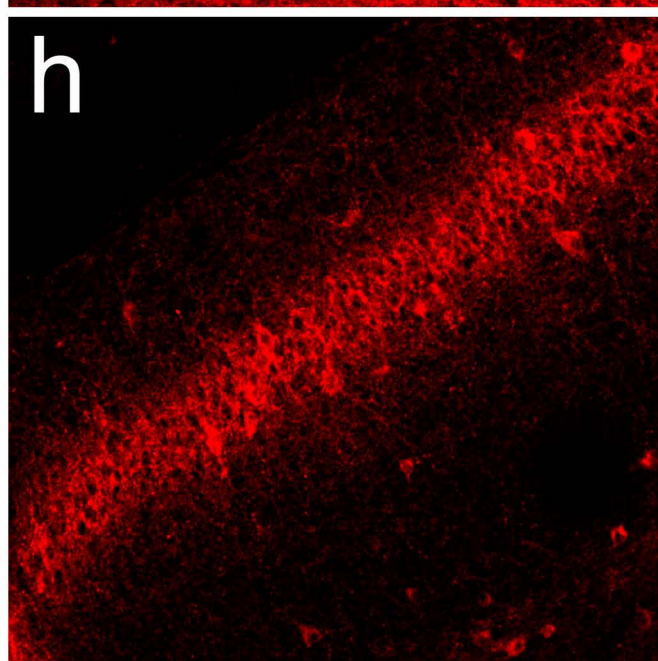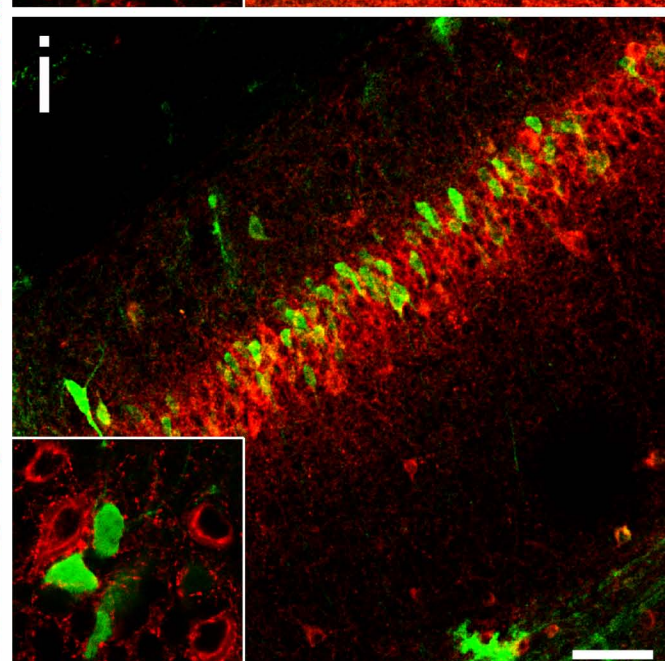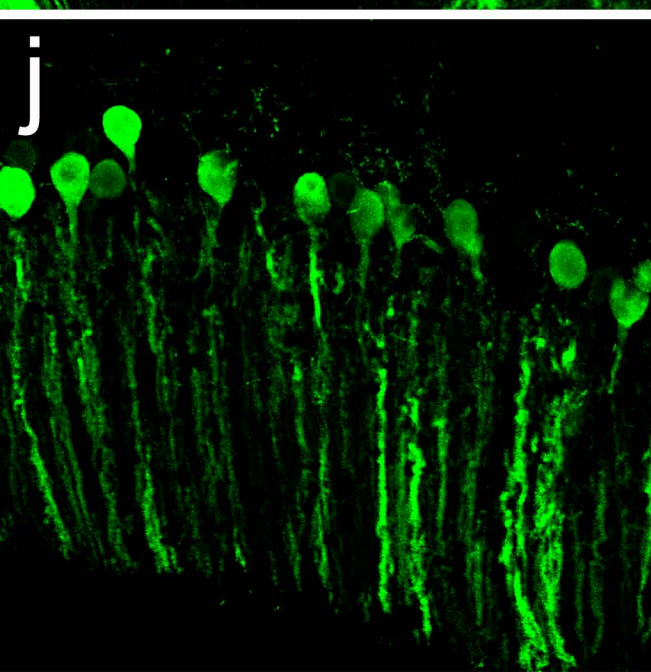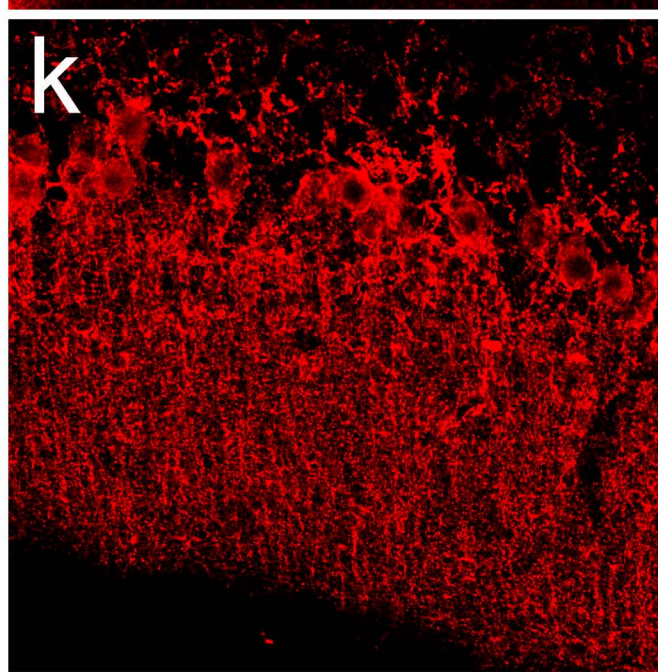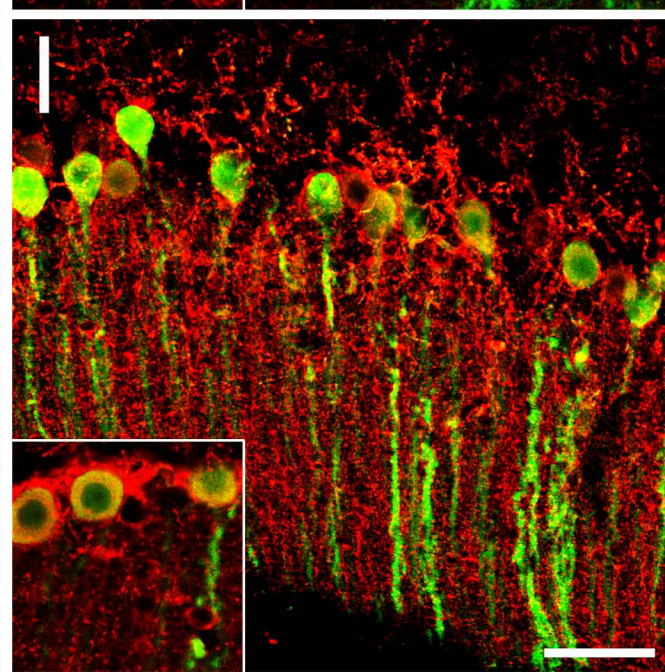

Supplement: NIHMS213182-supplement-supp2.pdf [file NIHMS213182-supplement-supp2.pdf]

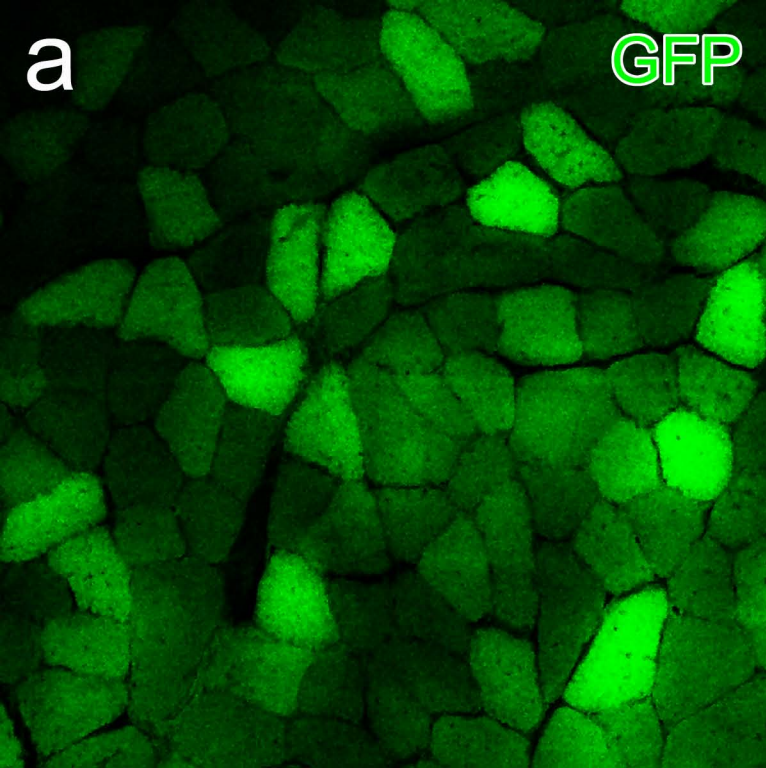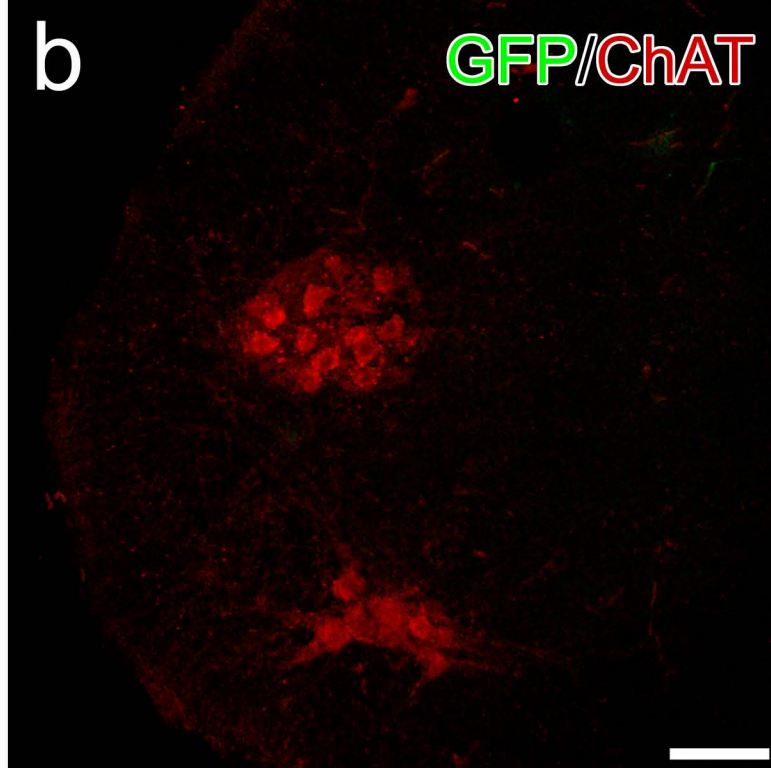

Supplement: NIHMS213182-supplement-supp3.pdf [file NIHMS213182-supplement-supp3.pdf]

Ladder

scAAV9 CB GFP  
 $1 \times 10^{13}$  vg/ml  
batch 1

scAAV9 CB GFP  
 $4 \times 10^{12}$  vg/ml  
batch 2

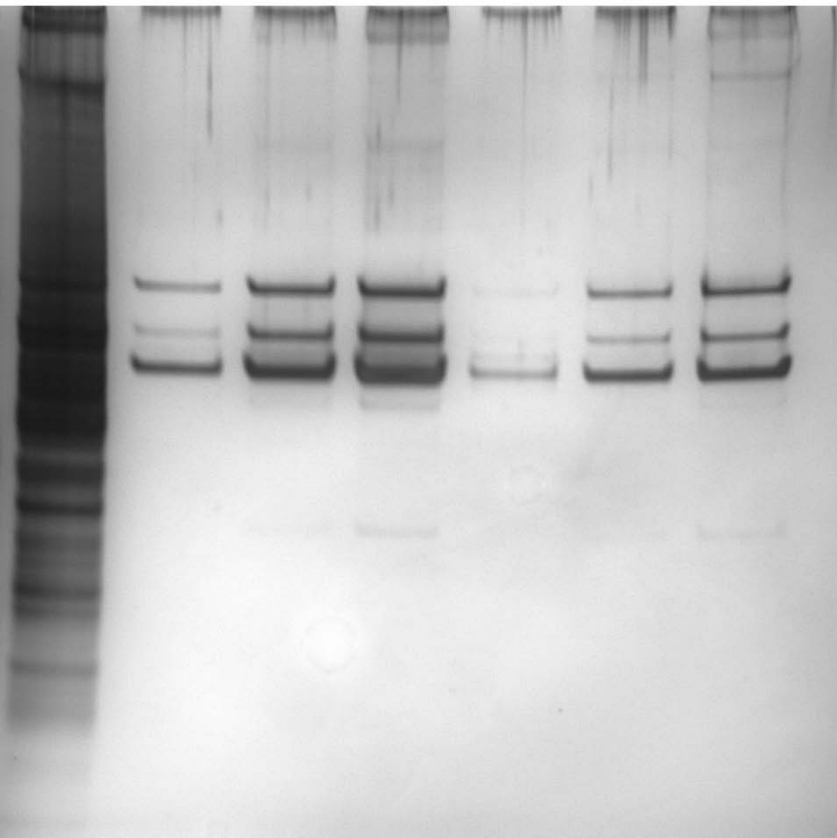

Supplement: NIHMS213182-supplement-supp4.pdf [file NIHMS213182-supplement-supp4.pdf]

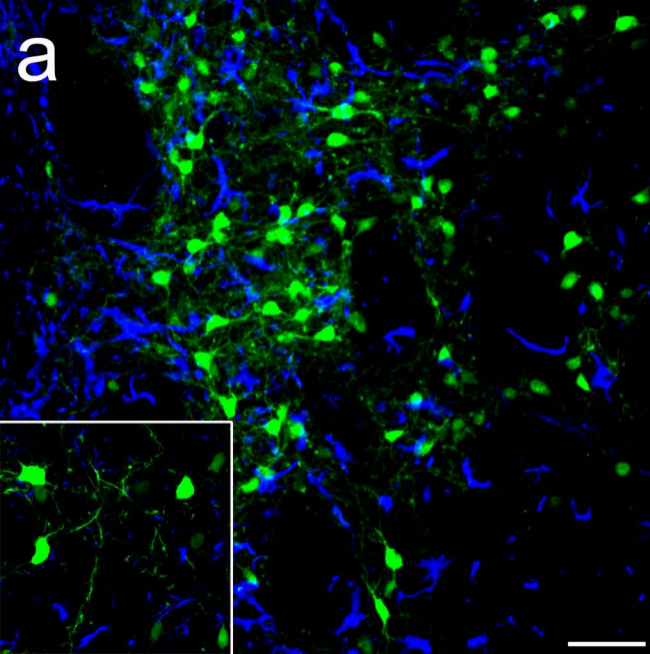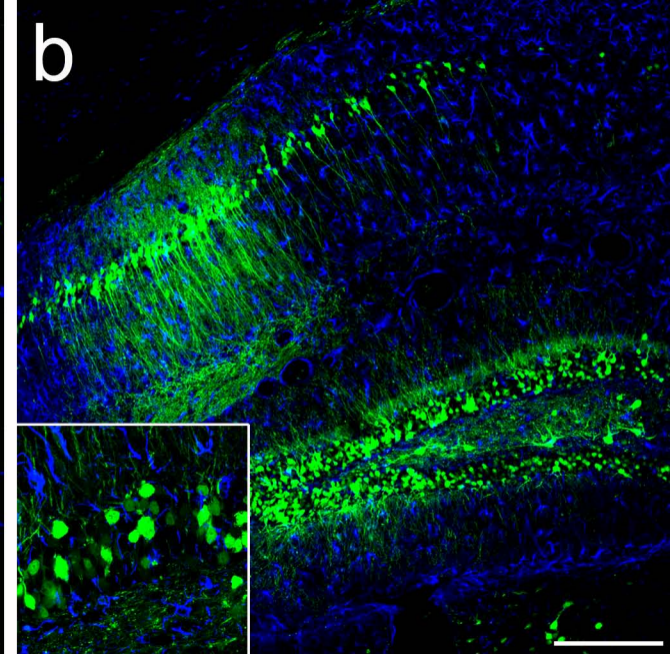

Supplement: NIHMS213182-supplement-supp5.pdf [file NIHMS213182-supplement-supp5.pdf]

**a**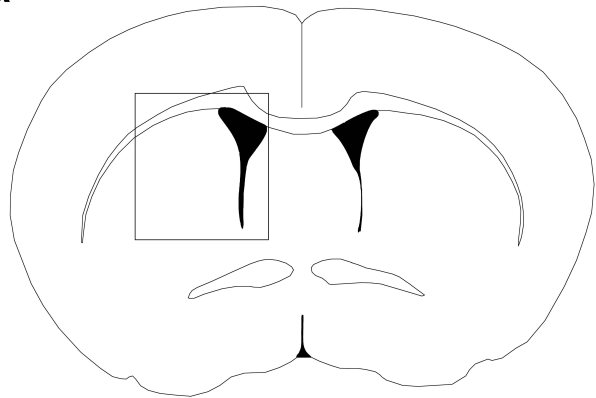**b**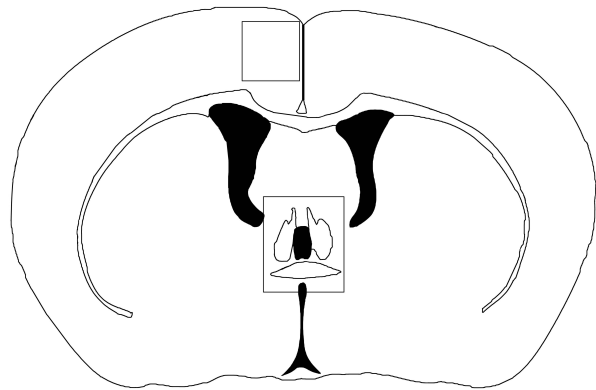**c**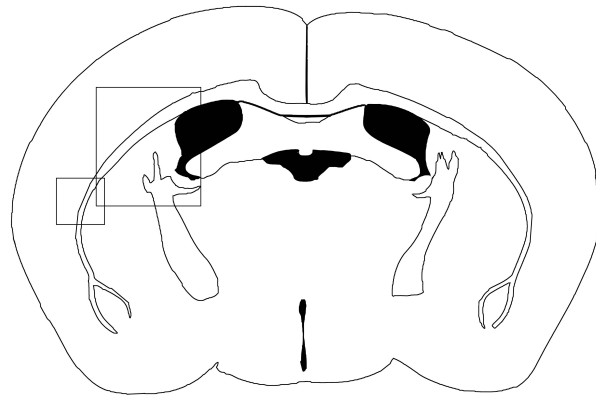**d**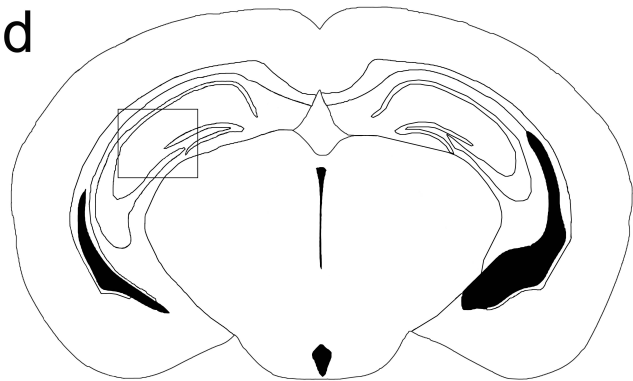**e**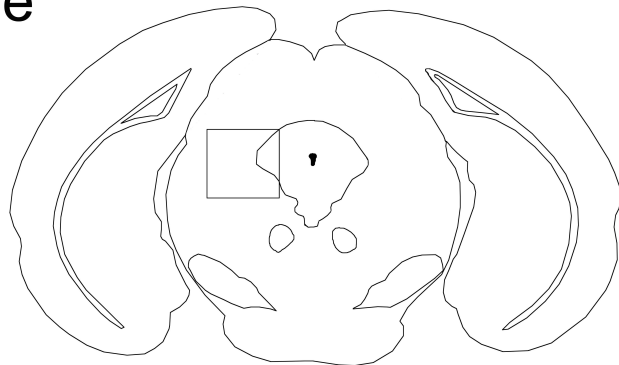**f**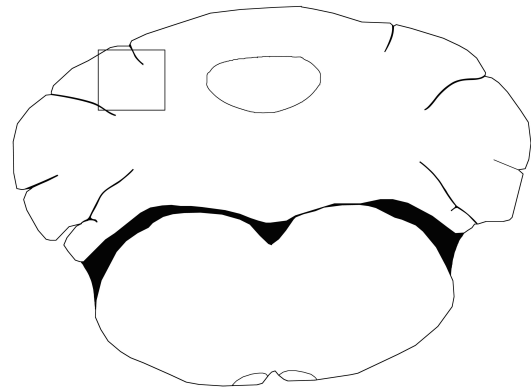

Supplement: NIHMS213182-supplement-supp6.pdf [file NIHMS213182-supplement-supp6.pdf]

**a**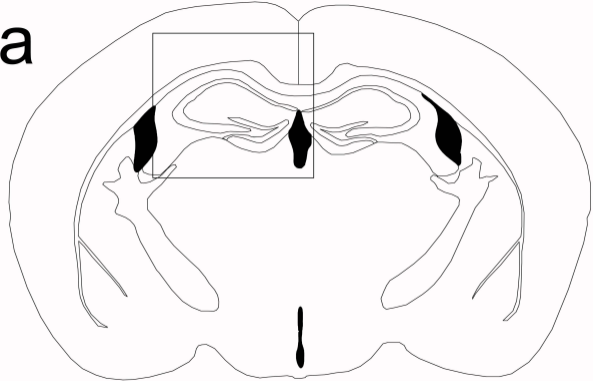**b**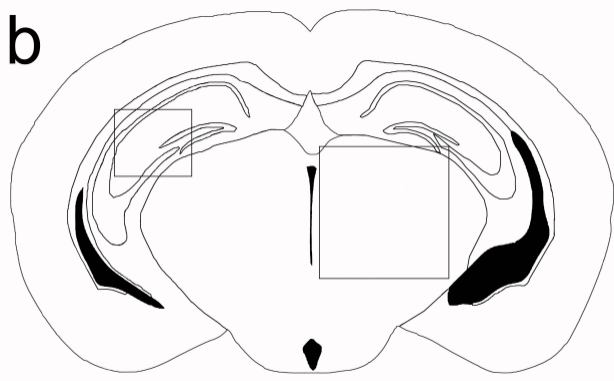**c**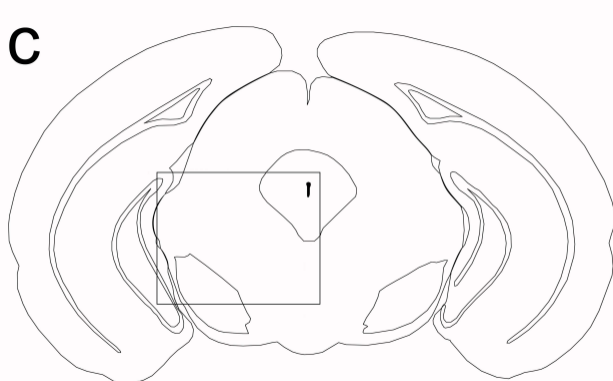

Supplement: NIHMS213182-supplement-supp7.pdf [file NIHMS213182-supplement-supp7.pdf]
